# Supplementary material
Source: ML conference proceedings conference paper supplement (https://openreview.net/forum?id=Eyb4e3GBuuR)
Supplement: supplementary_material [file attachment]

# Appendix: Energy-based Potential Games for Joint Motion Forecasting and Control

Anonymous Author(s)

Affiliation

Address

email

## A List of Abbreviations

| Abbreviation | Description                                   |
|--------------|-----------------------------------------------|
| App.         | Appendix                                      |
| ADE          | average displacement error                    |
| CDE          | conditional density estimation                |
| CV           | Constant Velocity                             |
| EBM          | Energy-based Model                            |
| EPOL         | Energy-based Potential Game Layer             |
| EPO          | Energy-based Potential Game                   |
| Eq.          | Equation                                      |
| FDE          | final displacement error                      |
| Fig.         | Figure                                        |
| GB           | gradient-based                                |
| HiVT-M       | Hierarchical Vector Transformer Modified      |
| IFT          | implicit function theorem                     |
| LB           | learning-based                                |
| LSTM         | long short-term memory                        |
| MLE          | maximum likelihood estimation                 |
| MLP          | multilayer perceptron                         |
| MB           | model-based                                   |
| NC           | noise contrastive                             |
| NE           | Nash equilibrium                              |
| NN           | neural network                                |
| NLL          | negative log likelihood                       |
| Nonlin.      | nonlinear                                     |
| Num.         | Number                                        |
| OCP          | optimal control problem                       |
| OLNE         | open-loop Nash equilibrium                    |
| OR           | overlap rate                                  |
| PDG          | potential differential game                   |
| RPI          | robot pedestrian interaction                  |
| SADE         | scene average displacement error              |
| SB           | sampling-based                                |
| Sec.         | Section                                       |
| Tab.         | Table                                         |
| SDV          | self-driving vehicle                          |
| SADE         | scene average displacement error              |
| SFDE         | scene final displacement error                |
| SOTA         | state-of-the-art                              |
| UN           | unrolling                                     |
| VIBES        | Vectorized Interaction-based Scene Prediction |
| V-LSTM       | Vector-LSTM                                   |

## 2 B Extended Related Work

3 **Data-driven Motion Forecasting.** Deep learning motion forecasting approaches use different  
 4 observation inputs. [1] uses birds-eye-view images, which have a high memory demand and can  
 5 lead to discretization errors. [2] propose to use a vectorized environment representation instead, and  
 6 [3] uses raw-sensor data. Many approaches utilize an encoder-decoder structure with convolutional  
 7 neural networks [4], transformers [5], or graph neural networks [6] to model multi-agent interactions.  
 8 In addition to deterministic models [5], various generative models, such as Generative Adversarial  
 9 Networks (GANs) [7] and Conditional Variational Autoencoder formulations [8], as well as Diffusion  
 10 Models [9], are used to produce multi-modal predictions. Predicting goals in hierarchical approaches  
 11 like [10], can further increase the predictive performance using domain knowledge of the map  
 12 information. Motion forecasting models can also be conditioned on the control [11] or future  
 13 trajectory [8] of one agent. However, these conditional forecasts might lead to overly confident  
 14 anticipation of how that agent may influence the predicted agents [12]. To include domain knowledge  
 15 such as system dynamics into the learning process, it is also common practice [13, 1, 8] to first  
 16 forecast the future control values of all agents and then to unroll a dynamics model to produce the  
 17 future states.

18 **Differentiable Optimization for Motion Planning.** Differentiable optimization has also been applied  
 19 in motion planning for SDVs. [14] and [15] imposes safety-constraints using differentiable control  
 20 barrier functions or gradient-based optimization techniques in static environments. [16] and [17]  
 21 couple a differentiable single-agent motion planning module with learning-based motion forecasting  
 22 modules. In contrast, our work performs multi-agent joint optimizations in parallel, derived from  
 23 a game-theoretic potential game formulation. Game-theoretic formulations can overcome overly  
 24 conservative behavior when used for closed-loop control [18].

## 25 C Theorems

26 This section provides the full theorem of [19]:

**Theorem C.1.** *For a differential game  $\Gamma_{\mathbf{x}_0}^T := (T, \{\mathbf{u}_i\}_{i=1}^N, \{C_i\}_{i=1}^N, f)$ , if for each agent  $i$ ,  
 the running and terminal costs have the following structure  $L_i(\mathbf{x}(t), \mathbf{u}(t), t) = p(\mathbf{x}(t), \mathbf{u}(t), t) +$   
 $c_i(\mathbf{x}_{-i}(t), \mathbf{u}_{-i}(t), t)$  and*

$$S_i(\mathbf{x}(T)) = \bar{s}(\mathbf{x}(T)) + s_i(\mathbf{x}_{-i}(T)),$$

*then, the open-loop control input  $\mathbf{u}^* = (\mathbf{u}_1^*, \dots, \mathbf{u}_N^*)$  that minimizes the following*

$$\begin{aligned} \min_{\mathbf{u}(\cdot)} \int_0^T p(\mathbf{x}(t), \mathbf{u}(t), t) dt + \bar{s}(\mathbf{x}(T)) \\ \text{s.t. } \dot{\mathbf{x}}_i(t) = f_i(\mathbf{x}_i(t), \mathbf{u}_i(t), t), \end{aligned}$$

27 *is an OLNE of the differential game  $\Gamma_{\mathbf{x}_0}^T$ , i.e.,  $\Gamma_{\mathbf{x}_0}^T$  is a potential differential game.*

28 **Proof:** See [19], with original proof provided by [20].

29 Here besides the potential functions  $p$  and  $\bar{s}$ ,  $s_i$  and  $c_i$  are terms that are required to not depend on  
 30 the state or control of agent  $i$ .

## 31 D Datasets

### 32 D.1 RPI

33 The RPI dataset is a synthetic dataset of simulated mobile robot pedestrian interactions. Multi-modal  
 34 demonstrations are generated by approximately solving a two-player differential game ( $N = 2$ )  
 35 with the iterative linear-quadratic game implementation of [21, 22] based on different start and goal  
 36 configurations. Fig. 1 provides an illustration for the dataset construction. The robot’s initial positions

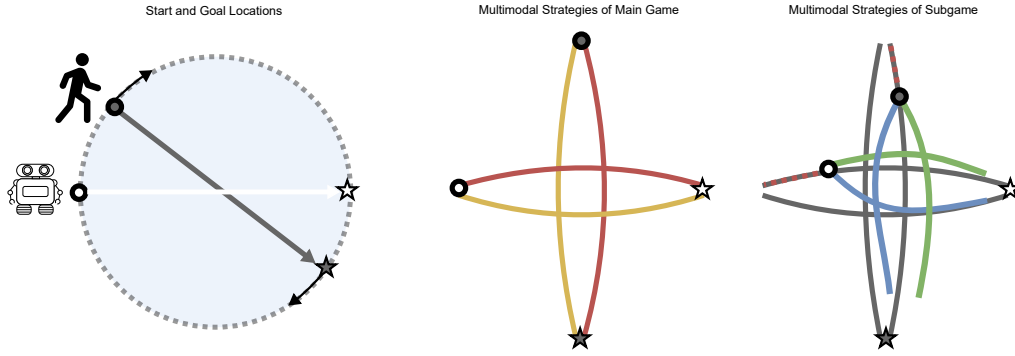

Figure 1: Dataset construction for RPI dataset. Left: First initial and goal states and game parameters are sampled. Middle: A *main game* is solved multiple times based on the sampled game configuration with subsequent result clustering. That leads to multimodal strategies (red and yellow). The agent moves according to the multimodal strategies of the main game. After a time step  $\Delta t$ , a *sub game* is solved. The results are multimodal strategies (blue and green) of the subgame. The histories (dotted red) and multi-modal strategies of the sub game build a demonstration for training and evaluation.

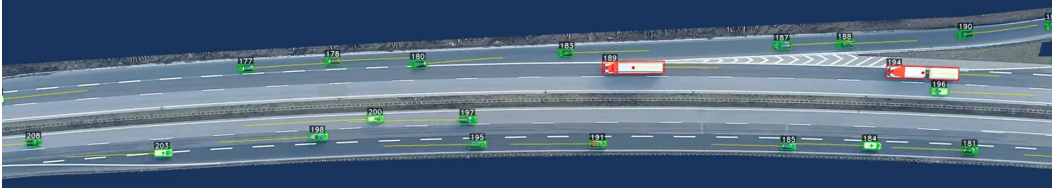

Figure 2: An exemplary highly-interactive scenario from the exiD dataset.

(white circle) and goal locations (white star) are the same in all solved games. In contrast, the initial state (dark grey circle) and goal location (dark grey stars) of the pedestrian move on a circle, as illustrated on the left graphic in Fig. 1. The agents are tasked to reach a goal location given an initial start state while avoiding collisions and minimizing control efforts. As solving the game once leads to a uni-modal local strategy, this work follows the implementation of Peters et al. [22]. It solves the game for a given initial configuration multiple times based on different sampled strategy initializations. Afterward the resulting strategies are clustered. The clustered strategies represent multi-modal strategies of the *main game*, and they are visualized in red and yellow in Fig. 1. The agents then execute the open-loop controls of the main game’s initial strategies. After every time interval  $\Delta t = 0.1$ , the procedure of game-solving and clustering the results is repeated as long as the agents pass each other. The resulting strategies of the so-called *subgames* are visualized in green and blue on the right of Fig. 1. Based on the history (dotted red line) and the strategies of the subgame (blue and green), we then build a multi-modal demonstration for the dataset. Note that the main game and the corresponding subgames use the same cost function parametrizations, but the agents’ preferences for collision avoidance differ between main games.

The resulting dataset is based on 20 main games and their corresponding subgame solutions. Here we draw collision cost parameters from a uniform distribution to enhance demonstration diversity. The resulting dataset contains 60338 samples, whereas we use 47822 ( $\sim 80\%$ ) for training, 6228 for validation ( $\sim 10\%$ ), and 6228 ( $\sim 10\%$ ) for testing. The test set is constructed based on an unseen main game configurations. The goal is to predict  $M = 2$  joint futures of  $T = 4$  s based on a history of  $H = 1.8$  s with a time interval of  $\Delta t = 0.1$ .

## D.2 exiD

The exiD [23] dataset contains 19 h of real-world highly interactive highway data. Interactions between different types of vehicle classes are rich because the data was recorded by drones flying over seven locations of German highway entries and exits. Highway entries and exits, designed with acceleration and deceleration lanes and high-speed limits, promote interactive lane changes due to high relative speeds between on-ramping and remaining road users. In addition, the most common

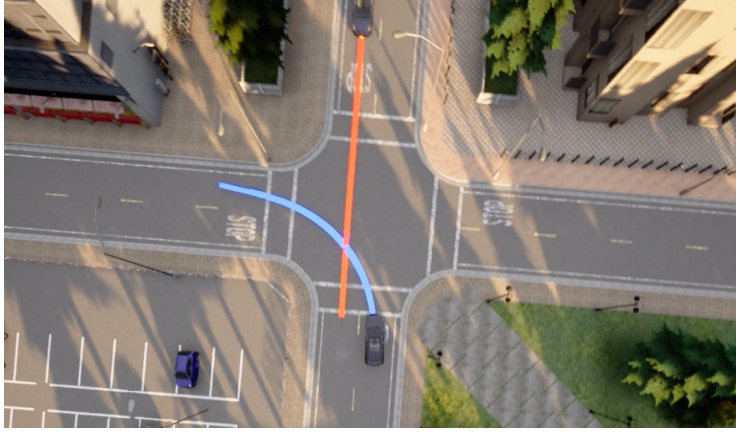

Figure 3: The CARLA left-turning scenario with planned joint trajectories.

64 cloverleaf interchange in Germany requires simultaneous observation of several other road users and  
 65 gaps between them for safe entry or exit in a short time frame [23].

66 To further increase the interactivity, this work extracts scenarios with  $N = 4$  agents in which at  
 67 least one agent performs a lane change. The recordings are then sampled with a frequency of  $\Delta t =$   
 68  $0.2\text{ s}$ . The different networks are tasked to predict  $M = 5$  joint futures of length  $T = 4\text{ s}$  based on  
 69 a history of  $H = 1.8\text{ s}$ . The resulting dataset contains 290735 samples, whereas we use 206592  
 70 ( $\sim 72\%$ ) for training, 48745 for validation ( $\sim 16\%$ ), and 35398 ( $\sim 12\%$ ) for testing. To investigate  
 71 the generalization capabilities of the different models, the test set contains *unseen scenarios from a*  
 72 *different map* (map 0) than the training and validation scenarios. An exemplary scenario is visualized  
 73 in Fig. 2.

### 74 D.3 CARLA

75 The experiment in the CARLA simulator (Version 9.11) use the implementation of [24] to construct  
 76 interactive scenarios, whereas the SDV is tasked to perform an unprotected-left turn with another  
 77 vehicle approaching the intersection ( $N = 2$ ) as visualized in Fig. 3. To generate multi-modal  
 78 demonstrations for training, the agents follow hand-crafted policies, to generate different outcomes.  
 79 The SDV first decides whether to enter the intersection. The other vehicle decides to yield or allow  
 80 the SDV to pass. Subsequently, the SDV re-evaluates the initial maneuver. This results in different  
 81 interaction outcomes leading to multi-modal demonstrations.

82 This work uses four different intersections in Town 04. The approach is tasked to predict  $M = 2$   
 83 joint futures of length  $T = 6\text{ s}$  based on a history of  $H = 1.8\text{ s}$ . We only use five episodes of  
 84 different interaction outcomes for training. In contrast to the exiD and RPI experiments, we use an  
 85 agent-centric coordinate system with the SDV as the origin. To increase the training dataset size  
 86 we perform the following data augmentations: 1) We add additional samples based on the original  
 87 samples where all observations (history and map) are randomly rotated with an rotation angle drawn  
 88 from a uniform distribution  $\mathcal{U}[-\pi/8, \pi/8]$ . In these samples we 2) add Gaussian noise  $\mathcal{N}(0, 0.02)$   
 89 to the 2-D positions in the histories. Note that this augmentations are only performed for samples  
 90 of the training dataset. The resulting dataset contains 2959 samples, whereas we use 1836 ( $\sim 62\%$ )  
 91 for training, 361 ( $\sim 12\%$ ) for validation and 762 ( $\sim 26\%$ ) for testing. The training (intersection 1),  
 92 validation (intersection 2) and test set (intersection 3 and 4) all differ in terms of the used intersection.  
 93 During closed-loop control we evaluate on intersection 3.

94 In the closed-loop control experiment, the SDV follows the procedure described in Section 4.3 of  
 95 the main paper to predict the SDV strategy  $\mathbf{u}_{i=0}^{m*}$  and the corresponding state trajectory  $\mathbf{x}_{i=0}^{m*}$ . Two  
 96 PID-controller are used for trajectory tracking. They compute a steering angle, braking or throttle  
 97 signals to control the SDV in the simulator.

## 98 E Implementation Details

99 This section provides additional information for the used observation encoding backbones and the  
100 game parameter decoders. We further provide details for the used dynamics and energy features.

### 101 E.1 Network Architectures (Backbones and Baselines)

102 **Lane Encoder.** In all experiments, the lane encoders  $\phi^{\text{lane}}$  of all backbones use a PointNet [25] like  
103 architecture as [2] with three layers and a width of 64. The polylines are constructed based on vectors  
104 that contain a 2-D start and 2-D goal position in a fixed-global coordinate system. Agent polylines  
105 also include time step information and are processed with different encoders depending on the used  
106 backbone.

107 **Agent History Encoder.** The V-LSTM (Vector-LSTM) [26] and VIBES (Vectorized Interaction-  
108 based Scene Prediction) backbones use an LSTM [27] for agent history encoding with depth three and  
109 width 64. Our modified HiVT-M (Hierarchical Vector Transformer Modified) [28] implementation  
110 uses a transformer [29] for the encoding of each agent individually. Note that this contrasts with the  
111 original implementation, where the encoding transformer already models local agent-to-agent and  
112 agent-to-lane interactions. We account for that in a modified global interaction graph as listed below.  
113 The transformer has a depth of three and a width of 64.

114 **Global Interaction.** The V-LSTM backbones update the polyline features in the global interaction  
115 graph with a single layer of attention [29] as described by [2]. The HiVT-M and VIBES models use  
116 a two-stage attention mechanism. First, one layer of attention between the map and agent polyline  
117 features, and afterwards a layer of attention between all updated agents features are applied. The  
118 global interaction graph has a width of 128.

119 **Game Parameter and Initial Strategy Decoder.** The agent weight, goal, and initial strategy decoders  
120 are implemented by a 3-layer MLP with a width of 64.

121 **Goal Decoder.** The goal decoder follows [10]. It takes as input the concatenation of an agent  
122 feature  $\mathbf{z}_i$  and  $G = 60$  possible goal points, denoted by  $\mathbf{z}^{\text{goal}}$ . The goal points are extracted from  
123 the centerlines of the current and neighboring lanes. If there exists no neighboring lane, we take the  
124 lane boundaries. The decoder  $\phi^{\text{goal}}$  then predicts the logits of a categorical distribution per agent  
125  $\mathbf{l}_i^{\text{goal}} = \phi^{\text{goal}}(\mathbf{z}^{\text{goal}})$ . During training and evaluation, the method takes the  $M$  most-likely goals  $\mathbf{G}_i$  for  
126 all modes of a agent  $i$ . Probabilities for the goals per agent are computed by  $\mathbf{PR}_i^{\text{goal}} = \text{softmax}(\mathbf{l}_i^{\text{goal}})$ .  
127 The prediction of goals is made in parallel for all agents.

128 **Scene Probability Decoder.** The scene probability decoder also uses a 2-layer MLP with width  
129  $16 \times M$  and predicts logits  $\mathbf{l}^{\text{prob}}$  for the  $M$  scene modes. The scene probabilities are derived by  
130 applying the softmax operations  $\mathbf{PR} = \text{softmax}(\mathbf{l}^{\text{prob}})$ .

131 The goal, agent weight and scene probability decoder use batch normalization. The interaction weight  
132 decoder, initial strategy decoder, and transformer agent encoder use layer normalization.

133 In the CARLA experiment we scaled the width of all networks by half to mitigate overfitting. We  
134 also experimented with downscaling the network with by a factor of four, but saw no increase in  
135 performance for the baselines and our method.

### 136 E.2 Dynamics

137 The discrete-time dynamically-extended unicycle dynamics [30, Chapter 13] are given by:

$$\begin{aligned}
 x_{k+1} &= x_k + v_k \cos(\theta_k) \Delta t \\
 y_{k+1} &= y_k + v_k \sin(\theta_k) \Delta t \\
 v_{k+1} &= v_k + a_k \Delta t \\
 \theta_{k+1} &= \theta_k + \omega_k \Delta t
 \end{aligned} \tag{1}$$

139  $x_k$  and  $y_k$  denote a 2-D position and  $\theta_k$  the heading. In exiD and RPI the origin of the system is fixed.  
 140 In CARLA the origin is the SDV, whereas the  $x$  axis is aligned with the SDV.  $v_k$  is the velocity,  $a_k$   
 141 the acceleration,  $\omega_k$  the turnrate, and  $\Delta t$  a time interval. Hence,  $n_x = 4 \times N$  and  $n_u = 2 \times N$ .

### 142 E.3 Energy Features and Optimization

143 **Energy Features.** The energy function in the RPI experiment uses the following agent-dependent  
 144 features:  $c(\cdot) = [c_{\text{goal}}, c_{\text{vel}}, c_{\text{acc}}, c_{\text{velb}}, c_{\text{accb}}, c_{\text{turnr}}, c_{\text{accb}}, c_{\text{turnrb}}]$ . In the RPI experiments, the goal is  
 145 given and not predicted. The agent-dependent energy features in the exiD experiments are given  
 146 by  $c(\cdot) = [c_{\text{goal}}, c_{\text{lane}}, c_{\text{vref}}, c_{\text{vel}}, c_{\text{acc}}, c_{\text{jerk}}, c_{\text{steer}}, c_{\text{turnr}}, c_{\text{turnacc}}]$ . The agent-dependent energy features  
 147 in the CARLA experiments are given by  $c(\cdot) = [c_{\text{lane}}, c_{\text{vref}}, c_{\text{vel}}, c_{\text{acc}}, c_{\text{jerk}}, c_{\text{steer}}, c_{\text{turnr}}, c_{\text{turnacc}}]$ .  $c_{\text{goal}}$   
 148 is a terminal cost penalizing the position difference of the last state to the predicted goal.  $c_{\text{lane}}$   
 149 minimizes the distance of the state trajectory to the reference lane to which the predicted goal point  
 150 belongs. Note that different goal points can be predicted for the modes and as a result different lanes  
 151 can be selected to better model multi-modality.  $c_{\text{vref}}$  is the difference between the predicted and  
 152 and map-specific velocity limit. The other terms are running cost, evaluated for all timesteps and  
 153 penalize high velocities ( $c_{\text{vel}}$ ), accelerations ( $c_{\text{acc}}$ ), jerks ( $c_{\text{jerk}}$ ), as well as turn rates ( $c_{\text{turnr}}$ ) and turn  
 154 accelerations ( $c_{\text{turnacc}}$ ). An index b marks a soft constraint implemented as a quadratic penalty, active  
 155 when the bound is violated. Hence an inequality constraint  $g(z) \leq 0$  with optimization variable  $z$  is  
 156 implemented by a feature  $\max(0, g(z))$ . The interaction feature  $d(\cdot)$  is also implemented as such a  
 157 quadratic penalty. We evaluate the collision avoidance features at every discrete time step in the RPI  
 158 experiments. In all experiments, agent geometries are approximated by circles of radius  $r_i$ , which is  
 159 accurate for the mobile robot and pedestrian but an over-approximation for vehicles (CARLA, exiD)  
 160 and especially for trucks in the highway exiD environment, where we use  $r_i = L/2$ .  $L$  is the length  
 161 of a vehicle. Hence, we evaluate collision avoidance every fifth timestep in the exiD experiments.  
 162 Future work could also use more accurate vehicle approximations (e.g., multiple circles [31]) to  
 163 further evaluate collision avoidance at every time step to increase the predictive performance at a  
 164 higher runtime and memory cost. In the RPI experiments, we set  $r_i = 0.25$  m.

165 **Optimization.** As the approach already predicts accurate initial strategies  $\mathbf{U}^{\text{init}}$ , our experiments  
 166 only required a few optimization steps. Concretely, the results of Tab. 2 and 3 in the main paper  
 167 are obtained with  $s = 2$  optimization steps, rendering our approach real-time capable (see Fig. 9).  
 168 Note while the approach also works, with a higher number of optimization steps (see Fig. 8), our  
 169 experiments showed that fewer optimization steps lead to similiar results, with decreased runtime  
 170 and memory requirements due to the predicted initialization. Both experiments use a stepsize of  
 171  $\alpha = 0.3$ . The experiments use a damping factor of  $dp = 10$  in the Levenberg-Marquardt solver [32].  
 172 In the CARLA experiment we use  $s = 20$ . Especially in the low sample regime, a higher number  
 173 of optimization steps is beneficial due to inductive bias from the game-theoretic optimization as the  
 174 initialization performance is decreased, as also later shown in Tab. 1.

### 175 E.4 Training Details

176 **Loss Functions.** The imitation loss in our experiments is the minSADE [6, 33] given by:

$$\mathcal{L}^{\text{imit}} = \min_{m=1}^M \frac{1}{N} \sum_{i=1}^N \|\mathbf{x}_i^m - \mathbf{x}_{\text{GT}}\|^2 \quad (2)$$

177 It first calculates the average over all distances between agent trajectories  $\mathbf{x}_i^m$  from agent  $i$  and mode  
 178  $m$  and the ground truth  $\mathbf{x}_{\text{GT}}$ . Then the minimum operator is applied to afterwards backpropagate  
 179 the difference of the joint scene, which is closest to the ground truth. The second loss term  $\mathcal{L}^{\text{goal}}$   
 180 computes the cross entropy (CE) for the goal locations averaged over all agents

$$\mathcal{L}^{\text{goal}} = \frac{1}{N} \sum_{i=1}^N \text{CE}(\mathbf{PR}_i^{\text{goal}}, \mathbf{g}_i^*), \quad (3)$$

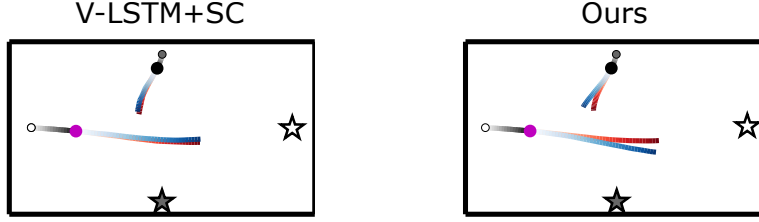

Figure 4: Qualitative comparison of the multi-modal ( $M = 2$ ) joint predictions in the RPI environment. The start and end point of the pink agent are located on a circles with a radius of 3m . The start and endpoint of the black agent are visualized with a grey circle and star. The different modes are visualized in red and blue color.

181 whereas  $\mathbf{g}_i^*$  is the target closest to the ground truth goal location. Lastly,  $\mathcal{L}^{\text{prob}}$  computes the cross  
 182 entropy for the joint futures

$$\mathcal{L}^{\text{prob}} = \text{CE}(\mathbf{PR}, \mathbf{x}^*), \quad (4)$$

183 whereas  $\mathbf{x}^*$  is the joint prediction target closest to the ground truth joint future, estimated with the  
 184 minSADE. We empirically set  $\lambda_1 = 1$ ,  $\lambda_2 = 0.1$ ,  $\lambda_3 = 0.1$  in the multi-task loss described in the  
 185 main paper.

186 In the RPI and exiD experiments, all approaches are trained with batch size 32, using the Adam  
 187 optimizer [34]. Our models in the RPI and exiD environments use a learning rate of 0.00005 across  
 188 all backbones. Note that the evaluation favors the baselines, as we performed grid searches for their  
 189 learning rates, whereas our approach uses the same learning rate across all backbones (exiD). In  
 190 CARLA we empirically set the batch size to 16 and the learning rate to 0.0005 for our method.

## 191 F Additional Experiments

### 192 F.1 Qualitative Results

193 This section provides extended qualitative results.

194 **RPI.** Fig. 4 visualizes an exemplary qualitative result of the RPI experiments. Both modes collapsed  
 195 when using the V-LSTM+SC baseline (explicit strategy). In contrast, this work’s implicit approach  
 196 better models the multi-modality present in the demonstration. Since the dataset contains solutions  
 197 of games solved with different collision-weight configurations, it can be seen that our proposed  
 198 method accurately differentiates between different weightings of collisions. This finding aligns with  
 199 these of [35], which discovered that implicit models could better represent the multi-modality of  
 200 demonstrations.

201 **exiD.** Fig. 5 visualizes multi-modal predictions in a highly interactive scenario, where one car (green)  
 202 and one truck (yellow) merge onto the highway. The green car performs a double-lane change.  
 203 Note how our model in mode three accurately predicts the future scene evolution and also outputs  
 204 reasonable alternative futures. For example, in mode one, the green car performs a single lane change,  
 205 whereas the blue and red cars are also predicted to change lanes. Another multi-modal prediction is  
 206 visualized in Fig. 6. Observe again how the ground truth is accurately predicted in this interactive  
 207 scenario (mode 5), whereas, for example, also other plausible futures are generated. For instance, the  
 208 yellow vehicle stays longer on the acceleration lane in mode one, whereas in mode three, the green  
 209 vehicle performs a lane change.

210 **CARLA.** Fig 7 visualizes another qualitative joint prediction results in the CARLA environment.  
 211 Observe how our method again predicts two reasonable joint futures, whereas the correct one (mode  
 212 1) has higher probability. In mode 1 the SDV (blue) goes first. That behavior is also observed when  
 213 inspecting the feature weights. For example the weight  $w_{\text{vref}}$  of the SDV (blue) is higher in mode  
 214 1 than in mode 2, inducing a acceleration in mode 1. The same holds for the red agent in mode 2.

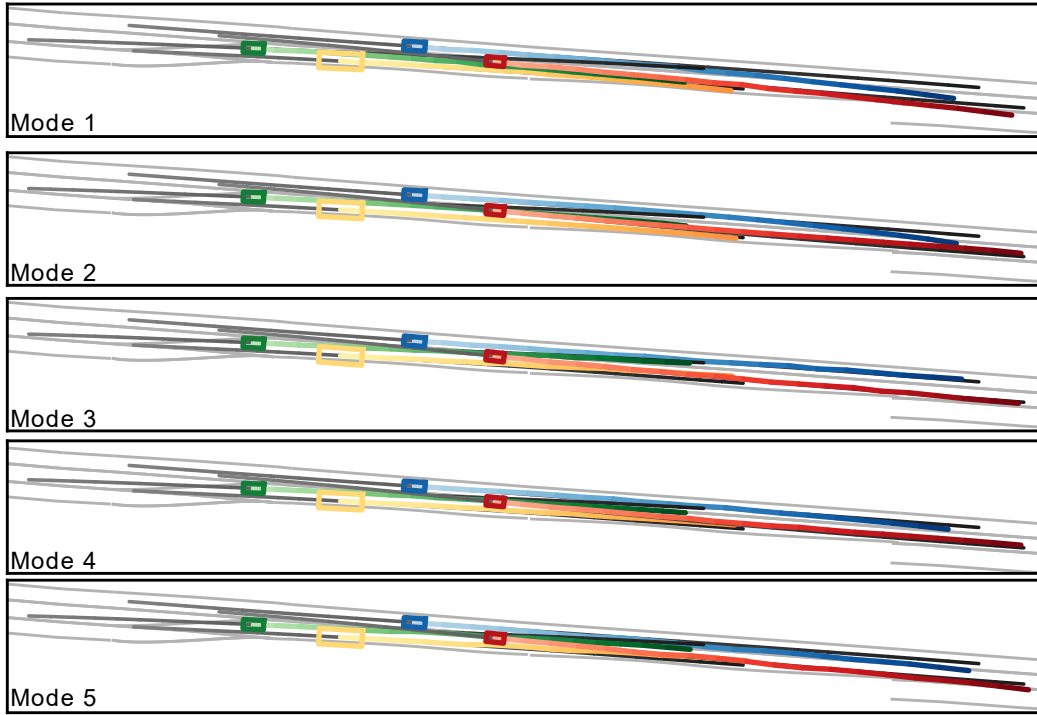

Figure 5: Multi-modal predictions in an interactive scenario, where the green and yellow perform on-ramp merges. The agent trajectories are visualized in different colors, whereas the color saturation increases the number of predicted steps. The ground truth (history and future) is shown with colors from dark grey to black and the map in light grey.

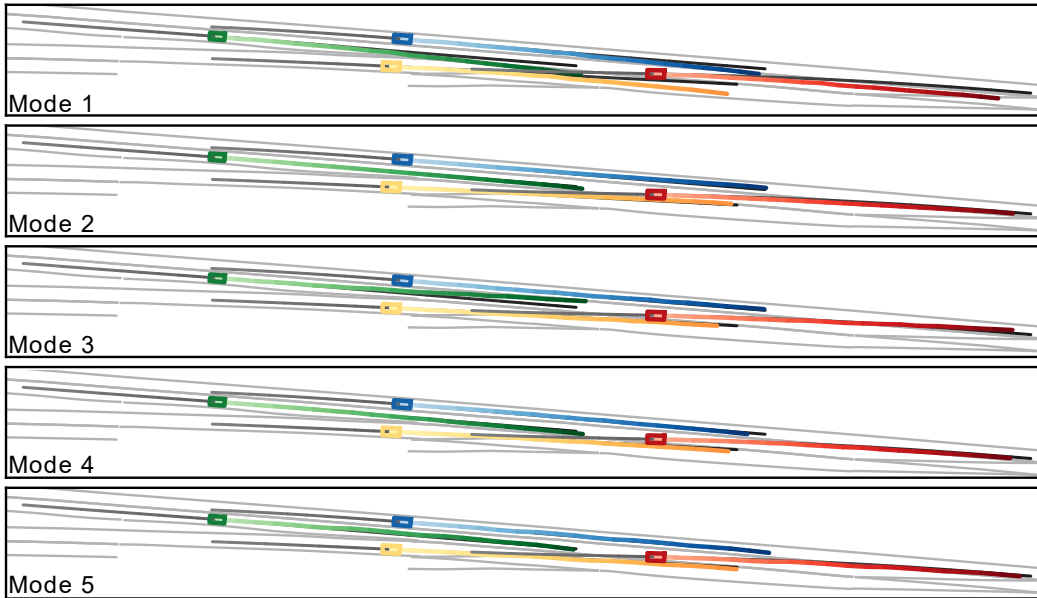

Figure 6: Multi-modal predictions in a interactive scenario, where the yellow and red agents perform lane changes. The agent trajectories are visualized in different colors, whereas the color saturation increases the number of predicted steps. The ground truth (history and future) is shown with colors from dark grey to black and the map in light grey.

215 Remember from the main paper, the weights are normalized with respect to the maximum weight of  
 216 the individual feature in the sequence. *Hence, weights of the same feature are comparable between*  
 217 *the two modes, but weights from different features are not comparable.*

## 218 F.2 Discussion of Interpretability

219 Following the definition of [36], interpretability in the context of SDV is achieved, among other things,  
 220 by the input, output, and intermediate representations. While the input (historical trajectories and  
 221 map information) and the output (future trajectories) are already human-interpretable, our approach  
 222 can also output interpretable intermediate representations in the form of feature weights. For instance,  
 223 visualization of these features can provide a consumer in the car another instance of insights about  
 224 what the SDV will do in the future. For example, assume a feature that minimizes the distance to a  
 225 stopping line. A high weight could indicate that the vehicle will stop at the line. Moreover, engineers  
 226 could use these weights during debugging and algorithmic design. For instance, if a weight converges  
 227 to always zero during training, it could indicate that the feature is unimportant, and hence, the  
 228 engineer could discard the feature to reduce algorithmic complexity. Lastly, the feature weights could  
 229 be used to design safety layers. For example, consider the scenario again in Fig 7 and assume another  
 230 module indicating if a scenario is safety-critical. If this new module now classifies that the scenario  
 231 is safety-critical, while our approach plans that the SDV should accelerate (e.g., indicated by a high  
 232 weight  $w_{\text{vref}}$ ), a third module could detect this conflict and overwrite the decision of our approach, to  
 233 perform a braking maneuver instead.

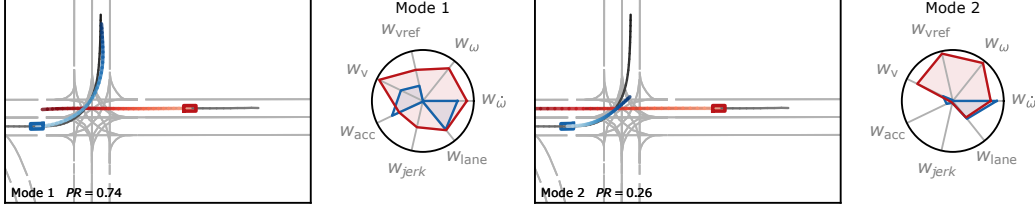

Figure 7: Qualitative joint predictions and feature weights for  $M = 2$  modes. The self-dependent weights  $\mathbf{W}_i^{\text{own}}$  normalized w.r.t. the maximum weight in the sequence. The ground truth is visualized with colors from dark grey to black and the map in light grey.

## 234 F.3 Demo Video

235 Please refer to the accompanying video for extensive visualization.

## 236 F.4 Quantitative Results

237 **CARLA.** Tab. 1 illustrates the predictive performance on the CARLA testset. We observed that  
 238 the strongest baseline, which also uses the scene-consistent loss formulation with control prediction  
 239 does not produce reasonable predictions, despite performing grid searches for different hyperparam-  
 240 eters. Our method outperforms the baseline by a large margin. Nevertheless, although our method  
 241 demonstrates practicality in this small-sample regime, the significance of the results is comparatively  
 242 limited, as previously stated in the work of [37]. Especially in automated driving applications one has  
 243 access to large datasets. However, in other robotics applications such as human-robot manipulator  
 244 collaborations [38] datasets are fairly limited and we hypothesize that the approach could be beneficial  
 245 here. We leave this studies for future work.

246 **Runtime.** Training and evaluation was performed using an AMD Ryzen 9 5900X and a Nvidia  
 247 RTX 3090 GPU. Fig. 9 shows the runtime dependency by varying the number of optimization steps  
 248  $S$ , the modes  $M$  and the number of agents  $N$ . We observe, that our approach scales well with the  
 249 number modes as all optimizations are parallelized on the GPU. The runtime increases with higher  
 250 numbers of steps and more agents as commonly reported in the game-theoretic literature. *Note that*

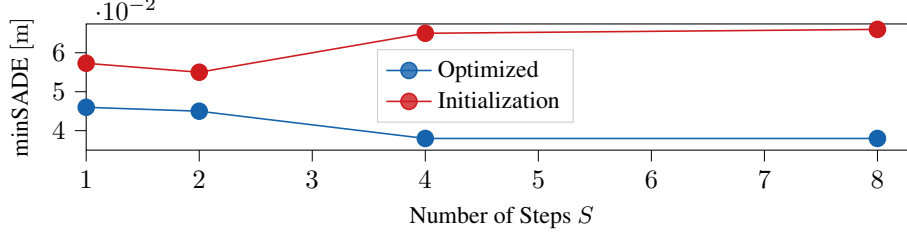

Figure 8: Predictive performance of the initial (red) and optimized strategy (blue) as a function of the number of optimization steps on the RPI validation dataset.

our multi-modal implementation scales better than common game-theoretic uni-modal solvers from the literature [39, Figure 4] for a higher number of agents.

Table 1: Predictive performance of different methods on the Carla test dataset. The metrics and formatting are the same as in Tab. 2 in the main paper, but  $M = 2$ .

| Method        | Marginal $\downarrow$ |             | Joint $\downarrow$ |             |
|---------------|-----------------------|-------------|--------------------|-------------|
|               | ADE                   | FDE         | SADE               | SFDE        |
| V-LSTM + SC   | 6.11                  | 12.37       | 6.21               | 13.34       |
| V-LSTM + Ours | <b>1.74</b>           | <b>3.28</b> | <b>1.83</b>        | <b>3.43</b> |

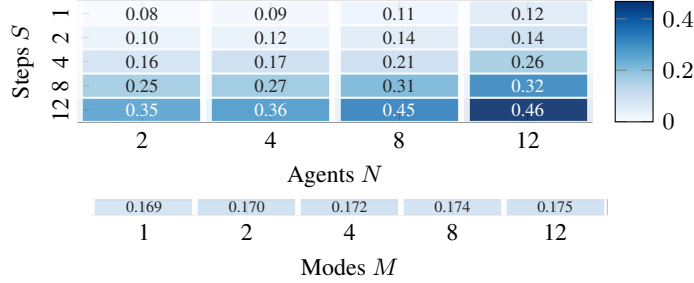

Figure 9: Runtime in [s] for different numbers of agents and optimization steps averaged over 100 exiD samples with  $M = 4$ . The experiments for the number of modes use  $S = 4$  and  $N = 4$ .

## F.5 Ablation Studies

**Ablating the Number of Optimization Steps** The experiments revealed that another influential hyperparameter is the number of steps  $S$  during optimization. Fig 8 visualizes the impact on the minSADE. Observe how the approach gets reasonable small metrics with all configurations and hence could be used with different numbers of steps. However, while the distance between the closest optimized joint future and the GT gets smaller with increasing optimization steps, the initialization gets slightly pushed away from the GT. Hence, with more steps, the approach gets less dependent on the initialization. [17] observes an similar effect for their differentiable single-agent optimization approach.

## G Additional Limitations

In this section we name additional limitations. Our CARLA experiment are limited by the dataset size (see discussion in Sec. F.4) and can be regarded as a proof-of-concept for closed-loop control. Moreover, we observed that in many scenarios, besides the interacting vehicles, other vehicles in the exiD dataset performed a nearly constant velocity movement, which is also verified by the good results of the constant velocity baselines in Tab. 2 of the main paper. Here, future work should

evaluate on larger urban datasets and simulators (e.g., [26]). Further, our approach assumes a object-based environment representation, with handcrafted input features (e.g., 2-D position information in agent histories) and low measurement uncertainties. However, raw-sensor data includes important information (e.g., the head movement of a pedestrian), which is relevant for downstream tasks such as motion forecasting and control. As our approach is fully differentiable, future work should explore joint perception and game-theoretic planning approaches. Doing so, would allow to propagate uncertainties through the whole system architecture, which has proven to be effective in prior work such as [40].

## References

- [1] H. Cui, T. Nguyen, F.-C. Chou, T.-H. Lin, J. Schneider, D. Bradley, and N. Djuric. Deep kinematic models for kinematically feasible vehicle trajectory predictions. In *2020 IEEE International Conference on Robotics and Automation (ICRA)*, pages 10563–10569, 2020.
- [2] J. Gao, C. Sun, H. Zhao, Y. Shen, D. Anguelov, C. Li, and C. Schmid. Vectornet: Encoding hd maps and agent dynamics from vectorized representation. In *Proceedings of the IEEE/CVF Conference on Computer Vision and Pattern Recognition (CVPR)*, June 2020.
- [3] K. M. K. S. L. Nicholas Rhinehart, Rowan McAllister. Precog: Prediction conditioned on goals in visual multi-agent settings. In *Proceedings of (ICCV) International Conference on Computer Vision*, pages 2821 – 2830, October 2019.
- [4] N. Deo and M. M. Trivedi. Convolutional social pooling for vehicle trajectory prediction. In *2018 IEEE Conference on Computer Vision and Pattern Recognition Workshops, CVPR Workshops 2018, Salt Lake City, UT, USA, June 18-22, 2018*, pages 1468–1476. Computer Vision Foundation / IEEE Computer Society, 2018.
- [5] J. Ngiam, V. Vasudevan, B. Caine, Z. Zhang, H. L. Chiang, J. Ling, R. Roelofs, A. Bewley, C. Liu, A. Venugopal, D. J. Weiss, B. Sapp, Z. Chen, and J. Shlens. Scene transformer: A unified architecture for predicting future trajectories of multiple agents. In *The Tenth International Conference on Learning Representations, ICLR 2022, April 25-29, 2022, 2022*.
- [6] S. Casas, C. Gulino, S. Suo, K. Luo, R. Liao, and R. Urtasun. Implicit latent variable model for scene-consistent motion forecasting. In *Computer Vision – ECCV 2020*, pages 624–641, Cham, 2020. Springer International Publishing.
- [7] A. Gupta, J. Johnson, L. Fei-Fei, S. Savarese, and A. Alahi. Social gan: Socially acceptable trajectories with generative adversarial networks. In *Proceedings of the IEEE Conference on Computer Vision and Pattern Recognition (CVPR)*, June 2018.
- [8] T. Salzmann, B. Ivanovic, P. Chakravarty, and M. Pavone. Trajectron++: Dynamically-feasible trajectory forecasting with heterogeneous data. In A. Vedaldi, H. Bischof, T. Brox, and J.-M. Frahm, editors, *Computer Vision – ECCV 2020*, pages 683–700, Cham, 2020. Springer International Publishing.
- [9] T. Gu, G. Chen, J. Li, C. Lin, Y. Rao, J. Zhou, and J. Lu. Stochastic trajectory prediction via motion indeterminacy diffusion. In *Proceedings of the IEEE/CVF Conference on Computer Vision and Pattern Recognition (CVPR)*, pages 17113–17122, June 2022.
- [10] H. Zhao, J. Gao, T. Lan, C. Sun, B. Sapp, B. Varadarajan, Y. Shen, Y. Shen, Y. Chai, C. Schmid, C. Li, and D. Anguelov. Tnt: Target-driven trajectory prediction. In *Proceedings of the 2020 Conference on Robot Learning*, volume 155 of *Proceedings of Machine Learning Research*, pages 895–904. PMLR, 16–18 Nov 2021.
- [11] C. Diehl, T. S. Sievernich, M. Krüger, F. Hoffmann, and T. Bertram. Uncertainty-aware model-based offline reinforcement learning for automated driving. *IEEE Robotics and Automation Letters*, 8(2):1167–1174, 2023.

- [12] C. Tang, W. Zhan, and M. Tomizuka. Interventional behavior prediction: Avoiding overly confident anticipation in interactive prediction. In *2022 IEEE/RSJ International Conference on Intelligent Robots and Systems (IROS)*, pages 11409–11415, 2022.
- [13] B. Varadarajan, A. Hefny, A. Srivastava, K. S. Refaat, N. Nayakanti, A. Cornman, K. Chen, B. Douillard, C. P. Lam, D. Anguelov, and B. Sapp. Multipath++: Efficient information fusion and trajectory aggregation for behavior prediction. In *2022 International Conference on Robotics and Automation (ICRA)*, pages 7814–7821, 2022.
- [14] W. Xiao, T.-H. Wang, R. Hasani, M. Chahine, A. Amini, X. Li, and D. Rus. Barriernet: Differentiable control barrier functions for learning of safe robot control. *IEEE Transactions on Robotics*, pages 1–19, 2023.
- [15] C. Diehl, J. Adamek, M. Krüger, F. Hoffmann, and T. Bertram. Differentiable constrained imitation learning for robot motion planning and control. art. arXiv:2210.11796, 2022.
- [16] P. Karkus, B. Ivanovic, S. Mannor, and M. Pavone. Diffstack: A differentiable and modular control stack for autonomous vehicles. In *Proceedings of The 6th Conference on Robot Learning*, volume 205 of *Proceedings of Machine Learning Research*, pages 2170–2180. PMLR, 14–18 Dec 2023.
- [17] Z. Huang, H. Liu, J. Wu, and C. Lv. Differentiable integrated motion prediction and planning with learnable cost function for autonomous driving. art. arXiv:2207.10422, 2023.
- [18] X. Liu, L. Peters, and J. Alonso-Mora. Learning to play trajectory games against opponents with unknown objectives. art. arXiv:2211.13779, 2023.
- [19] T. Kavuncu, A. Yaraneri, and N. Mehr. Potential ilqr: A potential-minimizing controller for planning multi-agent interactive trajectories. In *Robotics: Science and Systems XVII*, 07 2021.
- [20] A. Fonseca-Morales and O. Hernández-Lerma. Potential Differential Games. *Dynamic Games and Applications*, 8(2):254–279, June 2018.
- [21] D. Fridovich-Keil, E. Ratner, L. Peters, A. D. Dragan, and C. J. Tomlin. Efficient iterative linear-quadratic approximations for nonlinear multi-player general-sum differential games. In *2020 IEEE International Conference on Robotics and Automation (ICRA)*, pages 1475–1481, 2020.
- [22] L. Peters, D. Fridovich-Keil, C. J. Tomlin, and Z. N. Sunberg. Inference-based strategy alignment for general-sum differential games. In *Proceedings of the 19th International Conference on Autonomous Agents and MultiAgent Systems*, AAMAS ’20, page 1037–1045. International Foundation for Autonomous Agents and Multiagent Systems, 2020.
- [23] T. Moers, L. Vater, R. Krajewski, J. Bock, A. Zlocki, and L. Eckstein. The exid dataset: A real-world trajectory dataset of highly interactive highway scenarios in germany. In *2022 IEEE Intelligent Vehicles Symposium (IV)*, pages 958–964, 2022.
- [24] N. Rhinehart, J. He, C. Packer, M. A. Wright, R. McAllister, J. E. Gonzalez, and S. Levine. Contingencies from observations: Tractable contingency planning with learned behavior models. In *2021 IEEE International Conference on Robotics and Automation (ICRA)*, pages 13663–13669, 2021.
- [25] C. R. Qi, H. Su, K. Mo, and L. J. Guibas. Pointnet: Deep learning on point sets for 3d classification and segmentation. In *Proceedings of the IEEE Conference on Computer Vision and Pattern Recognition (CVPR)*, July 2017.
- [26] S. Ettinger, S. Cheng, B. Caine, C. Liu, H. Zhao, S. Pradhan, Y. Chai, B. Sapp, C. R. Qi, Y. Zhou, Z. Yang, A. Chouard, P. Sun, J. Ngiam, V. Vasudevan, A. McCauley, J. Shlens, and D. Anguelov. Large scale interactive motion forecasting for autonomous driving: The waymo open motion

- dataset. In *Proceedings of the IEEE/CVF International Conference on Computer Vision (ICCV)*, pages 9710–9719, October 2021.
- [27] S. Hochreiter and J. Schmidhuber. Long short-term memory. *Neural computation*, 9:1735–80, 12 1997.
- [28] Z. Zhou, L. Ye, J. Wang, K. Wu, and K. Lu. Hivt: Hierarchical vector transformer for multi-agent motion prediction. In *2022 IEEE/CVF Conference on Computer Vision and Pattern Recognition (CVPR)*, pages 8813–8823, 2022.
- [29] A. Vaswani, N. Shazeer, N. Parmar, J. Uszkoreit, L. Jones, A. N. Gomez, L. u. Kaiser, and I. Polosukhin. Attention is all you need. In *Advances in Neural Information Processing Systems*, volume 30. Curran Associates, Inc., 2017.
- [30] S. M. Lavalle. *Planning Algorithms*. Cambridge University Press, 2006.
- [31] J. Ziegler and C. Stiller. Fast collision checking for intelligent vehicle motion planning. In *2010 IEEE Intelligent Vehicles Symposium*, pages 518 – 522, 07 2010.
- [32] L. Pineda, T. Fan, M. Monge, S. Venkataraman, P. Sodhi, R. T. Q. Chen, J. Ortiz, D. DeTone, A. Wang, S. Anderson, J. Dong, B. Amos, and M. Mukadam. Theseus: A library for differentiable nonlinear optimization. In *Advances in Neural Information Processing Systems*, volume 35, pages 3801–3818. Curran Associates, Inc., 2022.
- [33] E. Weng, H. Hoshino, D. Ramanan, and K. Kitani. Joint metrics matter: A better standard for trajectory forecasting. art. arXiv:2305.06292, 2023.
- [34] D. P. Kingma and J. Ba. Adam: A method for stochastic optimization. In *3rd International Conference on Learning Representations, ICLR 2015, San Diego, CA, USA, May 7-9, 2015, Conference Track Proceedings*, 2015.
- [35] P. Florence, C. Lynch, A. Zeng, O. A. Ramirez, A. Wahid, L. Downs, A. Wong, J. Lee, I. Mordatch, and J. Tompson. Implicit behavioral cloning. In *Proceedings of the 5th Conference on Robot Learning*, volume 164 of *Proceedings of Machine Learning Research*, pages 158–168. PMLR, 08–11 Nov 2022.
- [36] É. Zablocki et al. Explainability of vision-based autonomous driving systems: Review and challenges. *International Journal Computer Vision*, 2022.
- [37] P. Geiger and C.-N. Straehle. Learning game-theoretic models of multiagent trajectories using implicit layers. *Proceedings of the AAAI Conference on Artificial Intelligence*, 35(6):4950–4958, May 2021.
- [38] M. Krämer, C. Rösmann, F. Hoffmann, and T. Bertram. Model predictive control of a collaborative manipulator considering dynamic obstacles. *Optimal Control Applications and Methods*, 41(4):1211–1232, 2020.
- [39] S. Le Cleac’h, M. Schwager, and Z. Manchester. Algames: a fast augmented lagrangian solver for constrained dynamic games. *Autonomous Robots*, 46, 01 2022.
- [40] W. Zeng, S. Wang, R. Liao, Y. Chen, B. Yang, and R. Urtasun. Dsdnet: Deep structured self-driving network. In *Computer Vision – ECCV 2020*, pages 156–172, Cham, 2020. Springer International Publishing.
